# Supplementary material
Source: PubMed Central journal article supplement (PMC2955876)
Supplement: supp_jn.110.127647_nut127647ST1.pdf [file supp_jn.110.127647_nut127647ST1.pdf]

**Supplemental Table 1** Arterial plasma amino acid concentrations following ingestion of 10g of essential amino acids in young men and women<sup>1</sup>

|                      | Time post-nutrient ingestion -----> |          |           |                         |           |                        |           |                        |           |                        |           |                        |           |                     |
|----------------------|-------------------------------------|----------|-----------|-------------------------|-----------|------------------------|-----------|------------------------|-----------|------------------------|-----------|------------------------|-----------|---------------------|
|                      | Baseline                            |          | 15 min    |                         | 30 min    |                        | 45 min    |                        | 60 min    |                        | 120 min   |                        | 180 min   |                     |
|                      | CTRL                                | LEU      | CTRL      | LEU                     | CTRL      | LEU                    | CTRL      | LEU                    | CTRL      | LEU                    | CTRL      | LEU                    | CTRL      | LEU                 |
| <i>Essential</i>     | <i>μmol · L<sup>-1</sup></i>        |          |           |                         |           |                        |           |                        |           |                        |           |                        |           |                     |
| His                  | 46 ± 8                              | 54 ± 7   | 56 ± 12   | 54 ± 7                  | 75 ± 18*  | 74 ± 8                 | 91 ± 19*  | 89 ± 12*               | 79 ± 17*  | 83 ± 17*               | 51 ± 8    | 61 ± 13                | 49 ± 9    | 51 ± 9              |
| Ile                  | 68 ± 5                              | 70 ± 8   | 138 ± 19* | 180 ± 25*               | 252 ± 33* | 239 ± 17*              | 289 ± 25* | 283 ± 41*              | 240 ± 15* | 194 ± 18*              | 133 ± 11  | 92 ± 8                 | 96 ± 9    | 46 ± 2 <sup>†</sup> |
| Leu                  | 121 ± 7                             | 123 ± 4  | 242 ± 29* | 519 ± 113* <sup>†</sup> | 434 ± 59* | 838 ± 68* <sup>†</sup> | 441 ± 46* | 890 ± 82* <sup>†</sup> | 437 ± 33* | 722 ± 75* <sup>†</sup> | 243 ± 14* | 375 ± 44* <sup>†</sup> | 197 ± 15* | 231 ± 17*           |
| Lys                  | 194 ± 9                             | 194 ± 8  | 266 ± 22* | 301 ± 27*               | 359 ± 29* | 341 ± 28*              | 422 ± 50* | 380 ± 46*              | 372 ± 28* | 321 ± 37*              | 246 ± 17  | 235 ± 14               | 201 ± 11  | 175 ± 15            |
| Met                  | 29 ± 1                              | 31 ± 2   | 38 ± 3    | 50 ± 6* <sup>†</sup>    | 53 ± 4*   | 61 ± 5*                | 54 ± 3*   | 62 ± 7*                | 46 ± 2*   | 51 ± 4*                | 31 ± 2    | 32 ± 2                 | 26 ± 1    | 23 ± 1*             |
| Phe                  | 54 ± 2                              | 58 ± 4   | 86 ± 7*   | 111 ± 16*               | 139 ± 16* | 164 ± 14*              | 153 ± 16* | 188 ± 15* <sup>†</sup> | 145 ± 11* | 158 ± 17*              | 91 ± 5*   | 103 ± 8*               | 75 ± 4    | 79 ± 6              |
| Thr                  | 162 ± 8                             | 99 ± 15  | 151 ± 27  | 151 ± 23                | 189 ± 34  | 172 ± 20*              | 275 ± 46* | 208 ± 17*              | 232 ± 37* | 214 ± 28*              | 184 ± 34  | 164 ± 28               | 179 ± 23  | 110 ± 13            |
| Trp                  | 51 ± 2                              | 51 ± 4   | 47 ± 3    | 78 ± 5                  | 47 ± 3    | 43 ± 3*                | 43 ± 2    | 44 ± 3*                | 45 ± 5    | 41 ± 3*                | 35 ± 2*   | 35 ± 4*                | 33 ± 3*   | 30 ± 3*             |
| Val                  | 194 ± 15                            | 209 ± 13 | 230 ± 19  | 274 ± 33                | 373 ± 35* | 392 ± 37*              | 461 ± 37* | 420 ± 25*              | 470 ± 38* | 400 ± 25*              | 318 ± 26* | 245 ± 12               | 239 ± 26  | 192 ± 10            |
| <i>Non-essential</i> |                                     |          |           |                         |           |                        |           |                        |           |                        |           |                        |           |                     |
| Ala                  | 258 ± 30                            | 270 ± 28 | 169 ± 23* | 207 ± 24*               | 217 ± 30  | 217 ± 35               | 210 ± 30  | 231 ± 34               | 235 ± 41  | 259 ± 46               | 180 ± 21* | 187 ± 41*              | 166 ± 21* | 162 ± 22*           |
| Asn                  | 51 ± 2                              | 56 ± 5   | 44 ± 2    | 41 ± 2                  | 46 ± 3    | 44 ± 3*                | 43 ± 2    | 44 ± 3                 | 40 ± 3*   | 42 ± 3*                | 37 ± 3*   | 37 ± 5*                | 35 ± 3*   | 32 ± 3*             |
| Asp                  | 44 ± 3                              | 46 ± 2   | 28 ± 2*   | 39 ± 2                  | 36 ± 2    | 35 ± 2*                | 26 ± 1*   | 35 ± 2*                | 39 ± 7    | 38 ± 3                 | 35 ± 2    | 41 ± 4                 | 32 ± 1*   | 33 ± 2*             |
| Glu                  | 168 ± 11                            | 196 ± 15 | 131 ± 16* | 142 ± 13*               | 162 ± 14  | 150 ± 9*               | 128 ± 16* | 145 ± 19*              | 142 ± 5   | 152 ± 16*              | 127 ± 9*  | 131 ± 11*              | 114 ± 9*  | 110 ± 11*           |
| Gln                  | 367 ± 47                            | 382 ± 52 | 406 ± 40* | 358 ± 66*               | 437 ± 36  | 412 ± 65*              | 476 ± 40* | 445 ± 59*              | 470 ± 43  | 422 ± 77*              | 374 ± 40* | 330 ± 51*              | 395 ± 32* | 327 ± 50*           |
| Gly                  | 281 ± 22                            | 270 ± 22 | 217 ± 21  | 208 ± 32                | 232 ± 16  | 224 ± 28*              | 205 ± 14  | 217 ± 33*              | 231 ± 24* | 215 ± 19*              | 221 ± 26* | 183 ± 18*              | 225 ± 19* | 208 ± 10*           |
| Orn                  | 83 ± 2                              | 102 ± 6  | 70 ± 4    | 94 ± 20                 | 66 ± 4    | 62 ± 3*                | 62 ± 4    | 83 ± 17                | 64 ± 9    | 67 ± 4                 | 58 ± 3*   | 67 ± 4*                | 49 ± 3*   | 50 ± 3*             |
| Pro                  | 176 ± 6                             | 179 ± 21 | 162 ± 10  | 171 ± 28                | 156 ± 7   | 154 ± 21               | 152 ± 4   | 155 ± 19               | 158 ± 14  | 147 ± 20               | 136 ± 4   | 137 ± 18               | 132 ± 7   | 121 ± 14            |
| Ser                  | 157 ± 15                            | 120 ± 10 | 171 ± 7   | 111 ± 26                | 191 ± 10  | 100 ± 6                | 126 ± 25  | 101 ± 10               | 145 ± 21  | 106 ± 12               | 150 ± 11  | 98 ± 11                | 143 ± 16  | 83 ± 8              |
| Tyr                  | 57 ± 2                              | 61 ± 5   | 62 ± 3    | 58 ± 4                  | 75 ± 5*   | 68 ± 5                 | 86 ± 7*   | 85 ± 12*               | 79 ± 3*   | 76 ± 3                 | 65 ± 1    | 62 ± 6                 | 57 ± 2    | 50 ± 2*             |

<sup>1</sup>Values are presented as mean ± SEM, n=14. \*Significantly different from Baseline within group,  $P \leq 0.05$ . <sup>†</sup>Significantly different from CTRL,  $P \leq 0.05$ .
